# Supplementary material
Source: MDPI journal article supplement (https://www.mdpi.com/2071-1050/10/2/436)
Supplement: s1 [file s1]

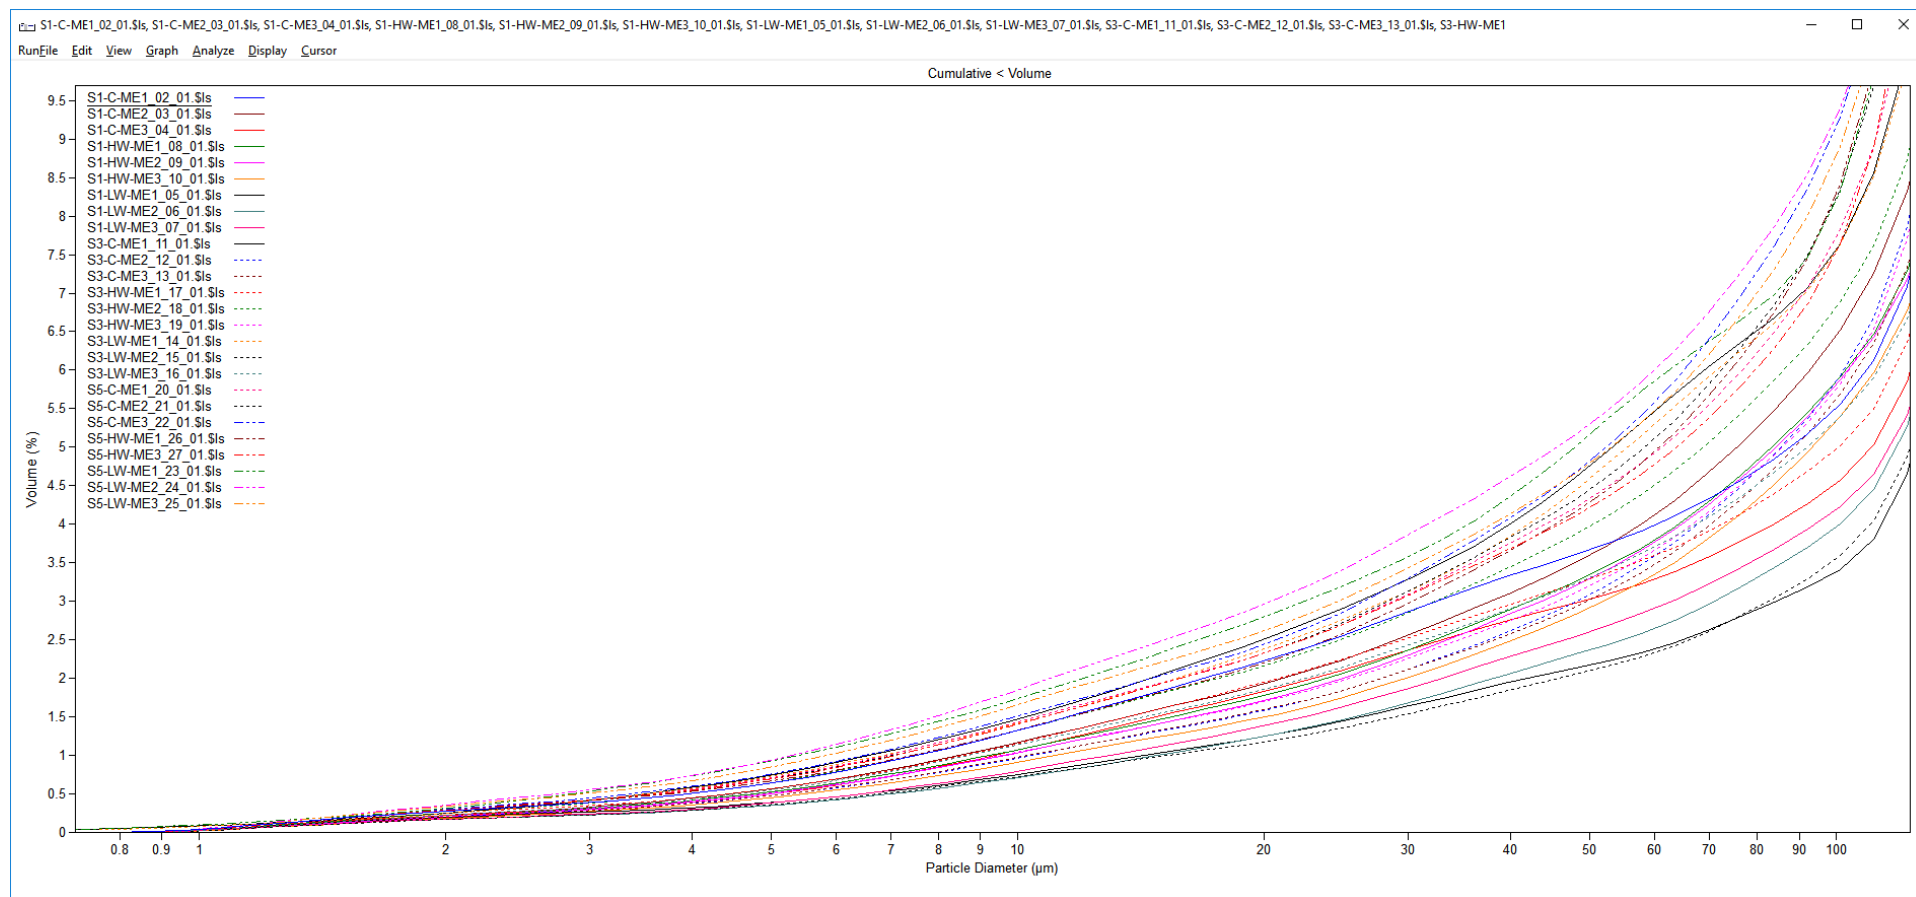

Figure S1. Cumulative Particle Size Distributions. Variation in curve shape occurs after the 40 μm range.
